# Supplementary material
Source: publisher figshare collection journal article supplement (https://gsajournals.figshare.com/ndownloader/files/10822001)
Supplement: Supplementary file 1 [file 10822001]

Table S3 – Genes deleted in the QFA.

| *ABP1* | *CTS2* | *HEK2* | *MMS1* | *POA1* | *RIF1* | *TCB3* | *YOS9* |
| --- | --- | --- | --- | --- | --- | --- | --- |
| *ALD3* | *DCC1* | *HHF1* | *MMS2* | *POL32* | *RIS1* | *TDP1* | *YPK3* |
| *ALK1* | *DDC1* | *HHF2* | *MMS22* | *POL4* | *RIT1* | *TEL1* | *YPS6* |
| *ALP1* | *DDR48* | *HHO1* | *MMS4* | *PPH3* | *RRD1* | *TEP1* | *YPT11* |
| *APL1* | *DFM1* | *HHT1* | *MNL1* | *PPS1* | *RRM3* | *THP2* | *YPT6* |
| *APL3* | *DIA3* | *HHT2* | *MNT4* | *PRM4* | *RSC2* | *TOF1* | *YSY6* |
| *APL6* | *DIN7* | *HIS3* | *MPH1* | *PSO2* | *RTT101* | *TOM70* | *ZDS1* |
| *APM2* | *DMC1* | *HMI1* | *MRC1* | *PSR1* | *RTT103* | *TOR1* | *ZRT3* |
| *APM3* | *DNF1* | *HMT1* | *MRE11* | *PSR2* | *RTT107* | *TOS3* |  |
| *APM4* | *DNF2* | *HRD1* | *MSB3* | *PSY1* | *RTT109* | *TOS4* |
| *APN1* | *DNF3* | *HSC82* | *MSB4* | *PSY2* | *SAC1* | *TPP1* |
| *APN2* | *DNL4* | *HSE1* | *MSH2* | *PSY3* | *SAE2* | *TRM2* |
| *APS1* | *DOA1* | *HSM3* | *MSH3* | *PTC2* | *SBH2* | *TRX1* |
| *APS2* | *DOT1* | *HSP30* | *MSH5* | *PTK1* | *SCS2* | *TRX2* |
| *APS3* | *DPH1* | *HST1* | *MSH6* | *PTP1* | *SCS22* | *TSA1* |
| *ARA1* | *DRS2* | *HTA1* | *MUS81* | *PTP3* | *SDH2* | *UBC4* |
| *ARF3* | *EAF3* | *HTA2* | *NAT1* | *PUF4* | *SDP1* | *UNG1* |
| *ARP8* | *EAF6* | *HUR1* | *NEJ1* | *PUF6* | *SDS3* | *VAM3* |
| *ASF1* | *EAF7* | *IES2* | *NEM1* | *RAD1* | *SEC22* | *VAM6* |
| *ASI1* | *ECM30* | *IES4* | *NGL2* | *RAD10* | *SEC28* | *VID22* |
| *AVT1* | *ECM5* | *INP52* | *NHP6A* | *RAD14* | *SEM1* | *VIP1* |
| *AVT2* | *EDE1* | *INP53* | *NMD2* | *RAD16* | *SER2* | *VPS27* |
| *BAS1* | *ELG1* | *IPT1* | *NPR2* | *RAD17* | *SFB2* | *VPS29* |
| *BCK1* | *EMI5* | *IRE1* | *NTG1* | *RAD23* | *SGS1* | *VPS35* |
| *BDF2* | *ERD1* | *IXR1* | *NTG2* | *RAD24* | *SHU1* | *VPS41* |
| *BMH2* | *ESBP6* | *KAP114* | *NUP170* | *RAD26* | *SIR2* | *VPS74* |
| *BPH1* | *ESC2* | *KHA1* | *OGG1* | *RAD27* | *SIR4* | *VPS75* |
| *BRE1* | *EST1* | *KNS1* | *OPI1* | *RAD28* | *SIW14* | *VPS8* |
| *BRE2* | *EST2* | *KRE2* | *PAN2* | *RAD30* | *SKI8* | *WSS1* |
| *BTN2* | *EXO1* | *LIF1* | *PAN3* | *RAD4* | *SLT2* | *WTM2* |
| *BUB2* | *FBP1* | *LYP1* | *PBP2* | *RAD5* | *SLX1* | *XRS2* |
| *BUB3* | *FIG4* | *LYS14* | *PCD1* | *RAD50* | *SLX4* | *YAF9* |
| *CAN1* | *FIT2* | *LYS20* | *PEP8* | *RAD51* | *SLX8* | *YCK1* |
| *CHK1* | *FRQ1* | *MAD1* | *PET130* | *RAD52* | *SML1* | *YCK2* |
| *CHS5* | *FUN30* | *MAD2* | *PEX19* | *RAD54* | *SNF5* | *YDL012C* |
| *CKA1* | *GAS1* | *MAD3* | *PGM2* | *RAD55* | *SOH1* | *YDL109C* |
| *CKA2* | *GBP2* | *MAG1* | *PHB2* | *RAD57* | *SSO1* | *YDR262W* |
| *CKB1* | *GCS1* | *MCK1* | *PHO13* | *RAD59* | *SSO2* | *YDR269C* |
| *CKB2* | *GEA1* | *MDR1* | *PHO3* | *RAD6* | *STD1* | *YEN1* |
| *CLB2* | *GGA1* | *MEI5* | *PHO5* | *RAD7* | *STI1* | *YET1* |
| *CLB3* | *GGA2* | *MET18* | *PHO8* | *RAD9* | *STM1* | *YET2* |
| *COG5* | *GPA2* | *MGS1* | *PHO88* | *RCF1* | *SUB1* | *YGL217C* |
| *CSF1* | *GPH1* | *MGT1* | *PHR1* | *RDH54* | *SUM1* | *YIM1* |
| *CSM2* | *GRR1* | *MIG3* | *PIK1* | *REH1* | *SWD1* | *YJR154W* |
| *CSM3* | *GYP6* | *MKT1* | *PIL1* | *RER1* | *SWD3* | *YKU70* |
| *CST9* | *GYP7* | *MLH1* | *PIN4* | *REV1* | *SWE1* | *YKU80* |
| *CTF18* | *HAC1* | *MLH2* | *PIR1* | *REV3* | *SXM1* | *YMR1* |
| *CTF4* | *HAP4* | *MLH3* | *PLM2* | *REV7* | *SYN8* | *YMR206W* |
| *CTK1* | *HAT1* | *MLP1* | *PMS1* | *RFM1* | *TCB1* | *YNK1* |
| *CTK3* | *HAT2* | *MLP2* | *PNG1* | *RIC1* | *TCB2* | *YNL011C* |
